# Supplementary material for: Local discrepancies in measles vaccination opportunities: results of population-based surveys in Sub-Saharan Africa
Source: PubMed Central journal article supplement (PMC3938072; doi:10.1186/1471-2458-14-193), 2014-02-21
Supplement: 1471-2458-14-193-S1.pdf [file 1471-2458-14-193-S1.pdf]

**Additional file:** Design, sample size and vaccination opportunities assessed in the population-based surveys, 2005-2011.

| Survey   |                     |             |      |        |                | Design          |                       |                            | Sample size                                   |                                  |      | Opportunities assessed |          |              |         |
|----------|---------------------|-------------|------|--------|----------------|-----------------|-----------------------|----------------------------|-----------------------------------------------|----------------------------------|------|------------------------|----------|--------------|---------|
| Country  | Place               | Context     | Year | Target | Days after ORI | Sampling        | Selection of children | Stratification             | Hypothesis*                                   | Sampling plan                    | N    | EPI                    | Last SIA | Previous ORI | MSF ORI |
| Chad     | N'Djaména           | Urban       | 2005 | 6-59m  | 30 days        | LQAS            | spin the pen          | -                          | -                                             | 25 lots of 65 children           | 1558 | x                      |          |              | x       |
| DRC      | Matadi              | Urban       | 2006 | 6m-15y | 17 days        | 2-stage cluster | spin the pen          | -                          | VC=65%; AP=2.5%                               | 30 clusters of 24 households     | 2105 | x                      |          |              | x       |
|          | Mbuji-Mayi          | Urban       | 2006 | 6-59m  | 12 days        | 2-stage cluster | spin the pen          | 3 administrative levels    | VC=65%; AP=3%                                 | 30 clusters of 24 households     | 3591 | x                      | x        |              | x       |
| Cameroon | Maroua              | Urban       | 2009 | 9m-15y | 68 days        | cluster         | satellite-based       | 3 measles incidence levels | VC=65%/75%/85%; AP=7; deff=3                  | 24/20/14 clusters of 22 children | 2708 | x                      |          | x            | x       |
| Chad     | N'Djamena           | Urban       | 2010 | 6m-15y | 8 days         | LQAS            | GPS-based             | -                          | -                                             | 28 lots of 65 children           | 1820 | x                      |          | x            | x       |
| Malawi   | Blantyre            | Urban-Rural | 2010 | 6m-15y | 51 days        | cluster         | satellite-based       | -                          | VC=80%; AP=5%; deff=4; 0.7 children per house | 40 clusters of 35 households     | 2978 | x                      | x        | x            | x       |
|          | Chiradzulu          | Rural       | 2010 | 6m-15y | 48 days        |                 | spin the pen          | -                          |                                               |                                  | 3106 | x                      | x        | x            | x       |
|          | Thyolo              | Rural       | 2010 | 6m-15y | 32 days        |                 | spin the pen          | -                          |                                               |                                  | 3331 | x                      | x        | x            | x       |
|          | Mangochi            | Rural       | 2010 | 6m-15y | 15 days        |                 | spin the pen          | -                          |                                               |                                  | 3402 | x                      | x        | x            | x       |
|          | Lilongwe            | Urban-Rural | 2010 | 6m-15y | 44 days        |                 | satellite-based       | -                          |                                               |                                  | 2517 | x                      | x        | x            | x       |
|          | Mzimba              | Urban-Rural | 2010 | 6m-15y | 62 days        |                 | spin the pen          | -                          |                                               |                                  | 3427 | x                      | x        | x            | x       |
|          | Balaka and Machinga | Urban-Rural | 2010 | 6m-15y | 19 days        |                 | spin the pen          | -                          |                                               |                                  | 3232 | x                      | x        | x            | x       |

DRC: Democratic Republic of Congo; CAR: Central African Republic

VC: vaccination coverage; AP: accepted precision; EPI: Expanded Program of Immunization; SIA: Supplementary immunization activity; ORI: Outbreak response immunization

\*For all the studies  $\alpha=0.05$

**Additional file (continuation):** Design, sample size and vaccination opportunities assessed in the population-based surveys, 2005-2011.

| Country | Survey        |             |      |        |                | Design          |                          |                                  | Sample size                                    |                                                     |      | Opportunities assessed |          |              |         |
|---------|---------------|-------------|------|--------|----------------|-----------------|--------------------------|----------------------------------|------------------------------------------------|-----------------------------------------------------|------|------------------------|----------|--------------|---------|
|         | Place         | Context     | Year | Target | Days after ORI | Sampling        | Selection of children    | Stratification                   | Hypothesis*                                    | Sampling plan                                       | N    | EPI                    | Last SIA | Previous ORI | MSF ORI |
| DRC     | Likasi city   | Urban       | 2011 | 6m-15y | 2 days         | 3-stage cluster | satellite-based          | Health zone                      | Each strata: VC=90%; AP=5%                     | Each strata: 18 clusters of 16 compounds            | 3919 | x                      | x        |              | x       |
|         | Lubumbashi    | Urban       | 2011 | 6m-15y | 11 days        | 3-stage cluster | satellite-based          | Measles incidence Administrative | In each pair of strata: VC=90%; AP=5%          | In each pair of strata: 24 clusters of 19 compounds | 6172 | x                      | x        |              | x       |
|         | Kapolowe      | Rural       | 2011 | 6m-15y | 1 day          | 3-stage cluster | spin the pen / satellite | -                                | VC = 80%; AP=5%; 2 eligible in each compound   | 30 clusters of 10 compounds                         | 968  | x                      | x        |              | x       |
|         | Kambove       | Rural       | 2011 | 6m-15y | 4 days         | 3-stage cluster | spin the pen             | -                                | VC = 80%; AP= 5%; 2 eligible in each compound  | 30 clusters of 10 compounds                         | 1128 | x                      | x        |              | x       |
|         | Kasenga       | Rural       | 2011 | 6m-15y | 95 days        | 3-stage cluster | spin the pen             | Low/High administrative VC       | VC=45%/70%; AP=5%; 2 eligible in each compound | 31/26 clusters of 13 compounds                      | 2009 | x                      | x        |              | x       |
|         | Malemba-Nkulu | Rural       | 2011 | 6m-15y | 38 days        | 3-stage cluster | spin the pen             | Low/High administrative VC       | VC=50/90%; AP=8%/5%                            | Each strata: 30 clusters of 10 compounds            | 1240 | x                      | x        |              | x       |
|         | Kipushi       | Rural       | 2011 | 6m-15y | 117 days       | 3-stage cluster | spin the pen             | -                                | VC=81%; AP=5%; 2 eligible in each compound     | 30 clusters of 13 compounds                         | 1432 | x                      | x        |              | x       |
| Burundi | Kirundo       | Rural       | 2011 | 6m-15y | 24 days        | 3-stage cluster | random                   | -                                | VC=90%; AP=5%                                  | 30 clusters of 12 compounds                         | 901  | x                      |          |              | x       |
| Chad    | Moïssala 1    | Rural       | 2011 | 9m-5y  | 48 days        | 3-stage cluster | spin the pen             | -                                | VC=75%; AP=6%; deff=3                          | 35 clusters of 23 compounds                         | 1502 | x                      |          | x            |         |
|         | Moïssala 2    | Rural       | 2011 | 9m-5y  | 48 to 61 days  | 3-stage cluster | random                   | -                                | VC=60%; AP=6%; deff=2                          | 35 clusters of 16 compounds                         | 1273 | x                      |          |              | x       |
| CAR     | Kabo          | Urban       | 2011 | 6m-15y | > 31 days      | 2-stage cluster | spin the pen             | 2 administrative levels          | VC=80%; AP=6%; deff=3                          | 30 clusters of 20 compounds                         | 480  | x                      |          | x            | x       |
|         | Batangafa     | Urban-Rural | 2011 | 6m-15y | 38 days        | 3-stage cluster | spin the pen             | -                                | VC=80%; AP=6%; deff=4                          | 30 clusters of 30 compounds                         | 2797 | x                      |          | x            | x       |

DRC: Democratic Republic of Congo; CAR: Central African Republic.

VC: vaccination coverage; AP: accepted precision; EPI: Expanded Program of Immunization; SIA: Supplementary immunization activity; ORI: Outbreak response immunization

\*For all the studies  $\alpha=0.05$
